# Supplementary material for: Clinical Evaluation of a Fully-Automated High-Throughput Multiplex Screening-Assay to Detect and Differentiate the SARS-CoV-2 B.1.1.529 (Omicron) and B.1.617.2 (Delta) Lineage Variants
Source: MDPI journal article supplement (doi:10.3390/v14030608), 2022-03-15
Supplement: s1 [file s1]

Nörz et al.

**Clinical evaluation of a fully-automated high-throughput multiplex screening-assay to detect and differentiate the SARS-CoV-2 B.1.1.529 (Omicron) and B.1.617.2 (Delta) lineage variants.**

Supplementary figures

Supplementary Figure S1

RBD-484-fwd : RBD-484-fwd

**Delta G:** -9.28 kcal/mole **Base Pairs:** 4

```
5' CTATCAGGCCGGTARCA
      :  : |||| :  :
3' ACRATGGCCGGACTATC
```

RBD-484-fwd : RBD-484-fwd

**Delta G:** -9.75 kcal/mole **Base Pairs:** 4

```
5' CTATCAGGCCGGTARCA
      :      ||||      :
3' ACRATGGCCGGACTATC
```

P681-fwd : P681-fwd

**Delta G:** -9.89 kcal/mole **Base Pairs:** 4

```
5' TGCAGGTATATGCGCTAGTTA
      :      ||||      :
3' ATTGATCGCGTATATGGACGT
```

RBD-484-fwd : P681R-probe

**Delta G:** -9.82 kcal/mole **Base Pairs:** 4

```
5' CTATCAGGCCGGTARCA
      ||||      :  :
3' GCGGCTGCTCTTA
```

RBD-484-fwd : P681H-probe

**Delta G:** -9.82 kcal/mole **Base Pairs:** 4

```
5' CTATCAGGCCGGTARCA
      |||| :  :  :
3' GCGGCTACTCTGA
```

*Oligo dimer alignments were generated using OligoAnalyzer Software (Integrated DNA Technologies, USA). Multiple consecutive matches at the 3' ends of both oligos are considered especially risky.*

## Supplementary Figure S2

Target: SDEL2

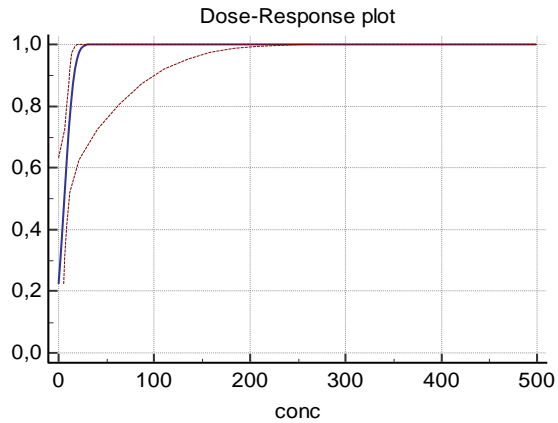

Target: E484A

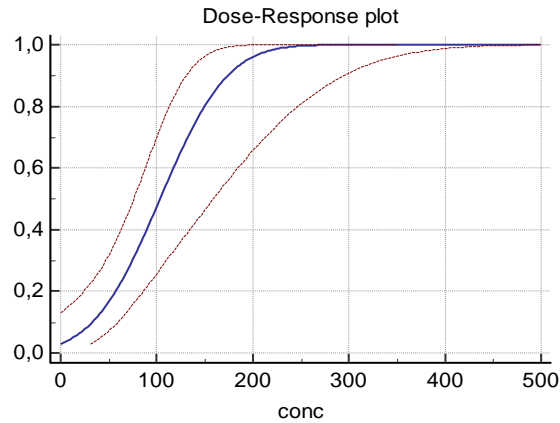

Target: P681H

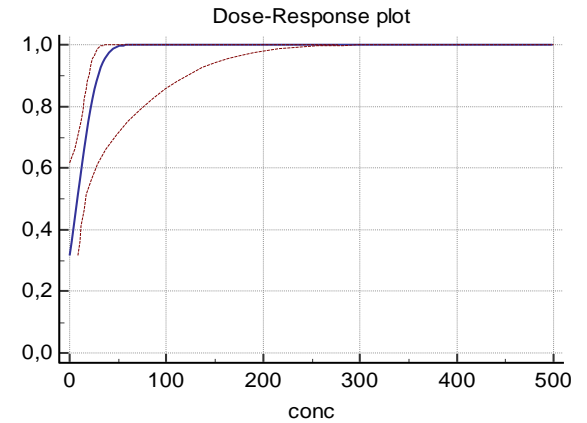

Target: P681R

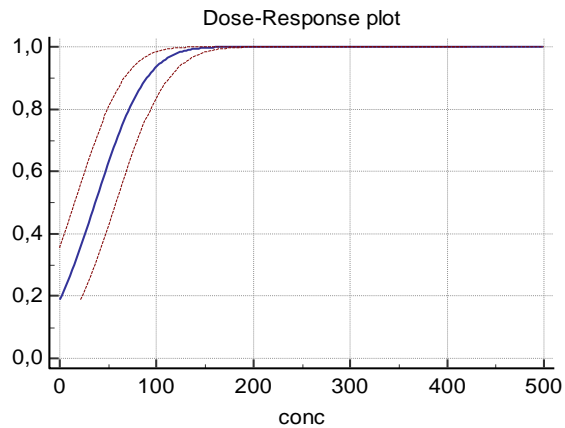

*Probit plots for LoD experiments were generated using MedCalc Software (Ostend, Belgium).*

# Supplementary Figure S3

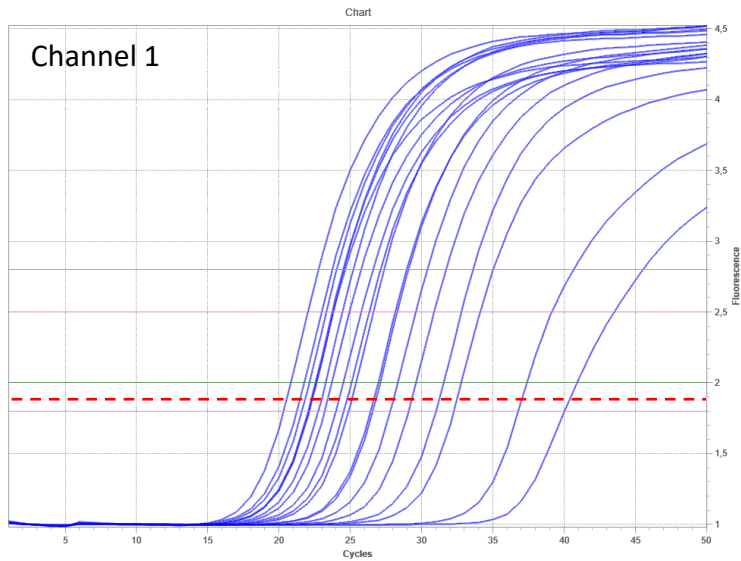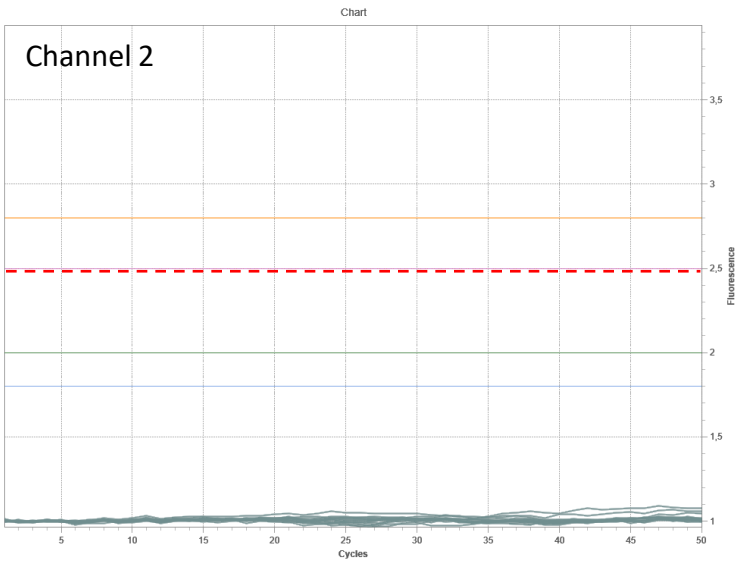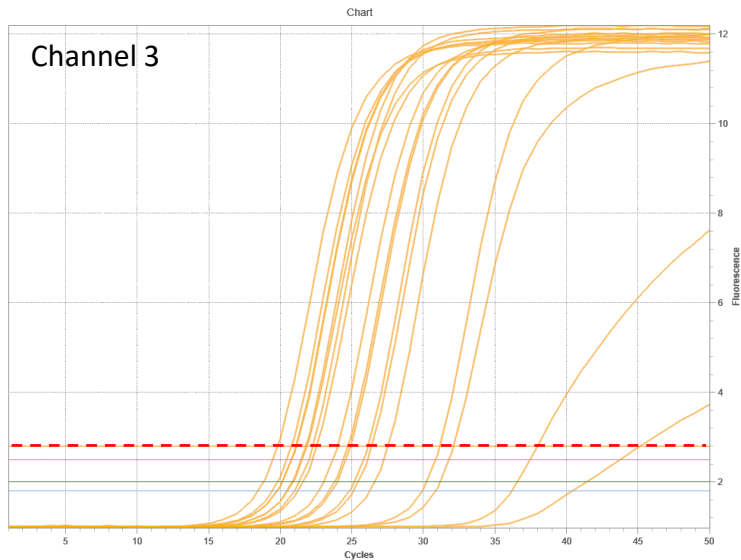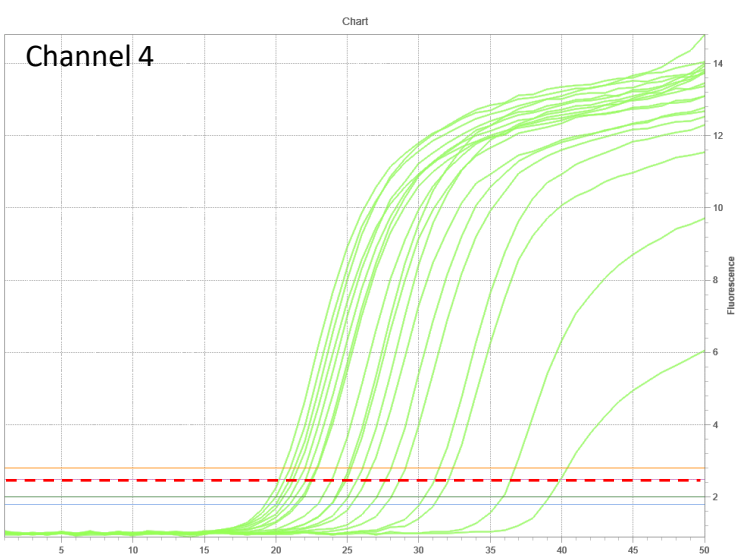

*Amplification curves of **BA.1-like** lineage (**Omicron variant**) samples, taken from the clinical sample set. Images were exported from the Utility Channel Optimization tool (Roche), Thresholds are indicated as dotted red line. (For exact threshold values, see table 2)*

# Supplementary Figure S4

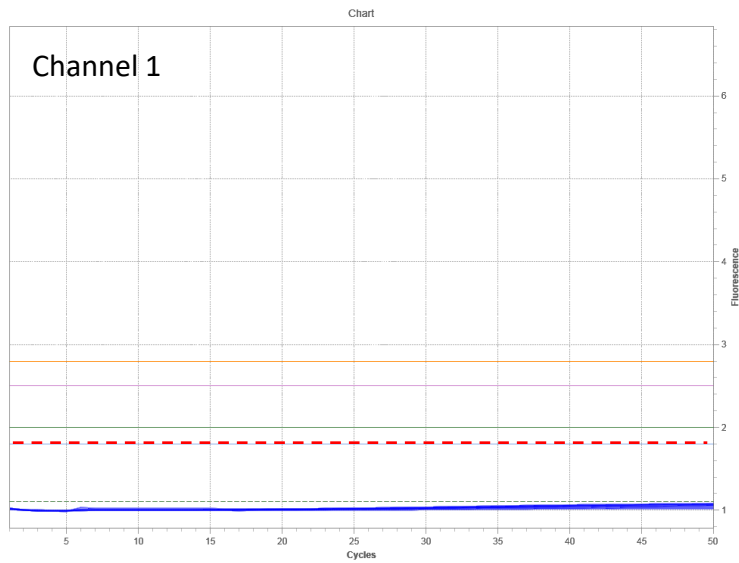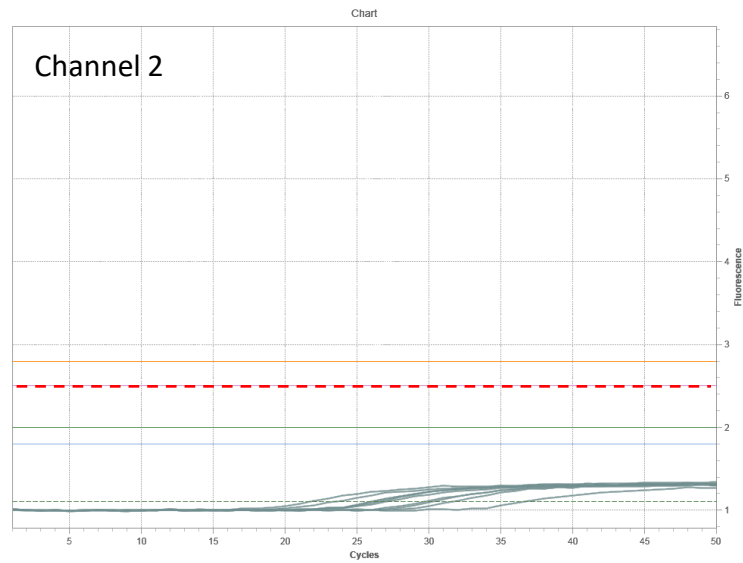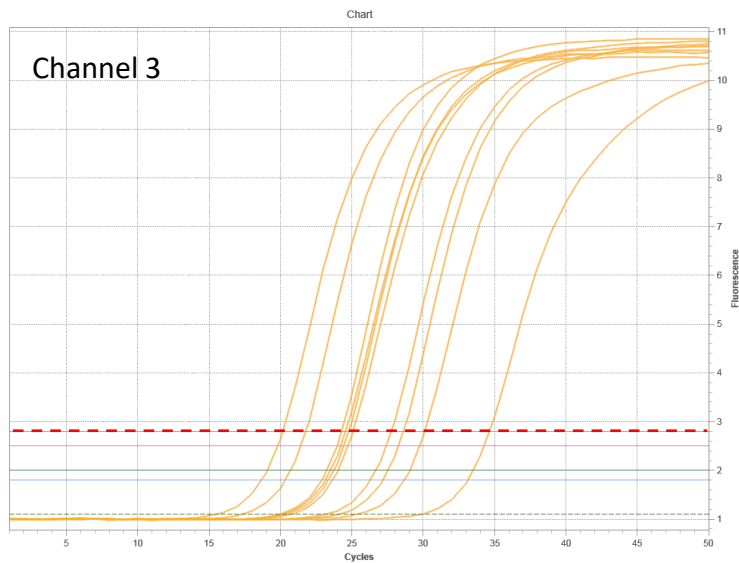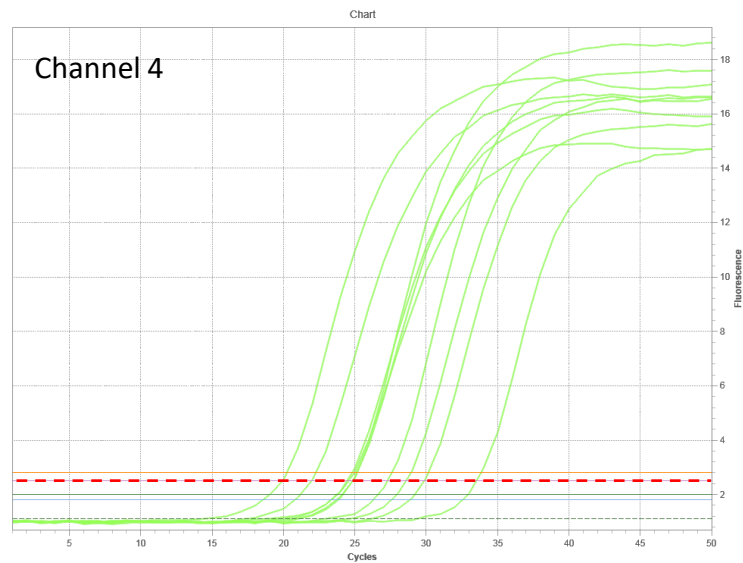

*Amplification curves of **BA.2-like** lineage (**Omicron variant**) samples, taken from the clinical sample set. Images were exported from the Utility Channel Optimization tool (Roche), Thresholds are indicated as dotted red line. (For exact threshold values, see table 2)*

# Supplementary Figure S5

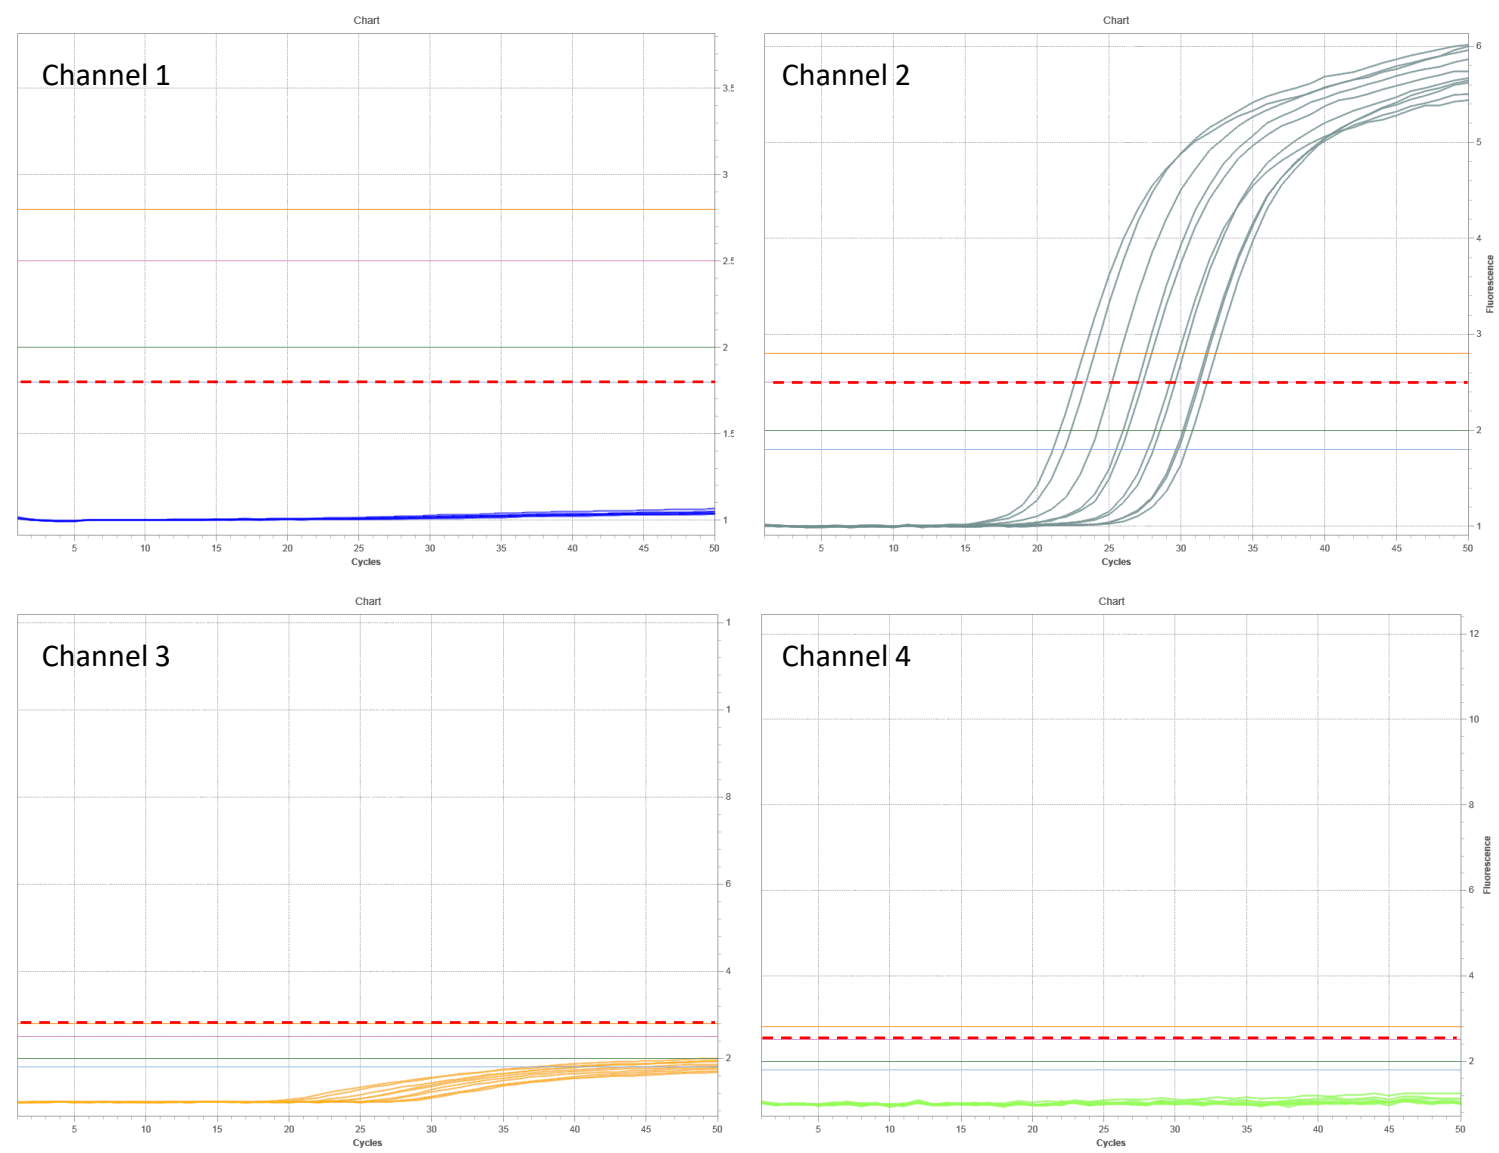

*Amplification curves of **B.1.617.2** lineage (**Delta variant**) samples, taken from the clinical sample set. Images were exported from the Utility Channel Optimization tool (Roche), Thresholds are indicated as dotted red line. (For exact threshold values, see table 2)*

# Supplementary Figure S6

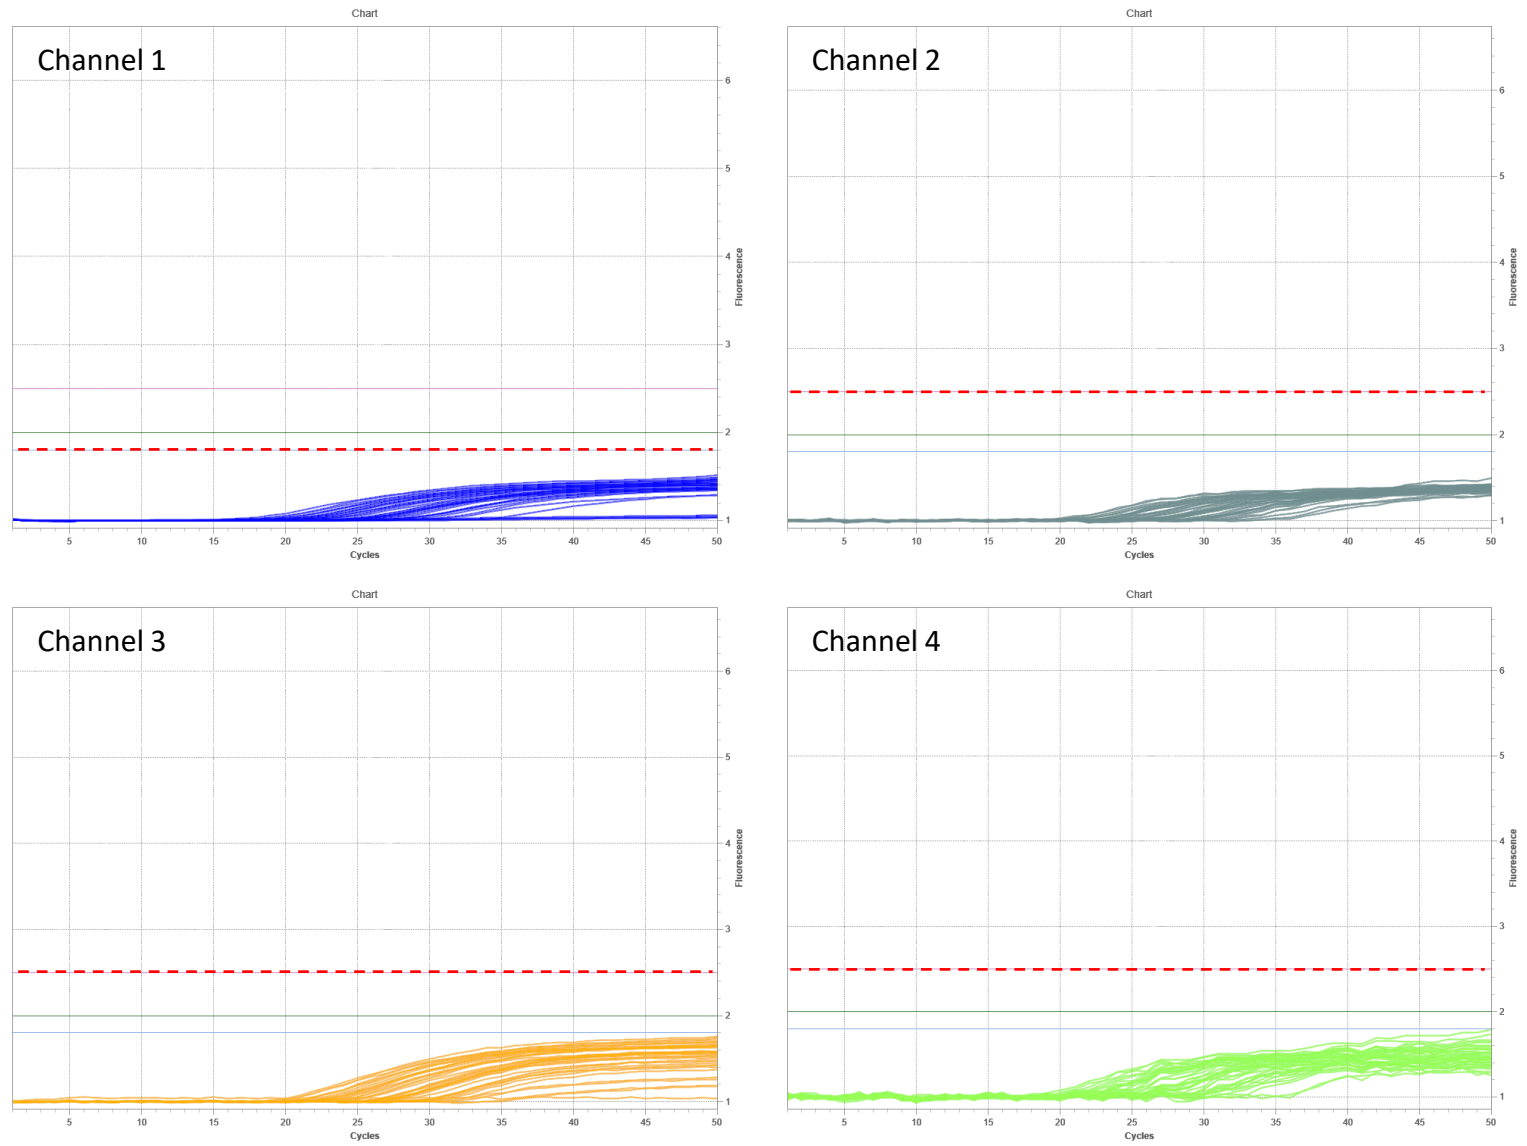

*Amplification curves of **B.1.1.7** lineage (**Alpha variant**) samples, taken from the clinical sample set. Images were exported from the Utility Channel Optimization tool (Roche), Thresholds are indicated as dotted red line. (For exact threshold values, see table 2)*

Nörz et al.

**Clinical evaluation of a fully-automated high-throughput multiplex screening-assay to detect and differentiate the SARS-CoV-2 B.1.1.529 (Omicron) and B.1.617.2 (Delta) lineage variants.**

Supplementary tables



## Supplementary Table S1

| Targets:                  | 1    |             | 3     | 4     |       | 2     |                                            |
|---------------------------|------|-------------|-------|-------|-------|-------|--------------------------------------------|
| Relevant mutations:       | A67V | del-HV69-70 | E484A | N679K | P681H | P681R | Detected by one or more multiplex targets? |
| BA.1 (Omicron variant)    | x    | x           | x     | x     | x     |       | yes                                        |
| BA.2 (Omicron variant)    |      |             | x     | x     | x     |       | yes                                        |
| B.1.617.2 (Delta variant) |      |             | (x)   |       |       | x     | yes                                        |
| B.1.1.7 (Alpha variant)   |      | x           |       |       | x     |       | no                                         |
| B.1.351 (Beta variant)    |      |             |       |       |       |       | no                                         |
| P.1 (Gamma variant)       |      |             |       |       |       |       | no                                         |

*Overview of current or former VOCs and the distribution of mutations relevant for the multiplex assay. Note that the E484A SNP does rarely occur in the Delta variant, but would return a positive result if present. For target 1 and target 4, both sequence variations need to be present in order to generate a positive result.*

Supplementary Table S2

|               | Total | Perfect align | %      |
|---------------|-------|---------------|--------|
| d67_70        | 13462 | 13346         | 99.14% |
| E484A         | 3472  | 3424          | 98.62% |
| P681H         | 11910 | 11870         | 99.66% |
| P681R         | 11910 | 11            | 0.09%  |
| All 3 targets | 2984  | 2982          | 99.93% |

*(i.e. at least one target positive)*

*All available Omicron variant sequences were analyzed by Roche Diagnostics (Pleasanton, USA) for mismatches with oligos used in this study. The number of valid sequences in the respective regions are listed. The value for all 3 targets represents the portion of sequences that are a perfect match for at least one of the three Omicron variant specific assays.*

## Supplementary Table S3

| Primer    | NTD F | NTD R | Probe1 | RBD F | 484 F | 484 R | RBD R | Probe3 | 681 F | 681 R | Probe4 | Probe2 |
|-----------|-------|-------|--------|-------|-------|-------|-------|--------|-------|-------|--------|--------|
| Zhen F    | 3.90  | 3.90  | 5.99   | 4.74  | 5.97  | 4.25  | 6.84  | 5.24   | 4.88  | 3.90  | 4.52   | 2.92   |
| Zhen R    | 3.90  | 3.29  | 7.30   | 3.40  | 4.97  | 5.00  | 3.90  | 3.90   | 3.29  | 5.00  | 2.92   | 2.92   |
| Zhen P V4 | 5.99  | 7.30  | 5.02   | 5.02  | 4.01  | 4.64  | 6.62  | 5.24   | 4.25  | 3.43  | 4.75   | 4.75   |
| RBD F     | 5.24  | 3.90  | 5.02   | 5.74  | 4.97  | 3.90  | 6.08  | 1.95   | 2.91  | 3.90  | 3.05   | 3.42   |
| 484 F     | 5.24  | 4.25  | 4.01   | 4.74  | 9.75  | 6.68  | 6.69  | 5.24   | 5.70  | 6.21  | 9.82   | 9.82   |
| 484 R     | 4.25  | 5.00  | 4.64   | 5.13  | 6.68  | 4.62  | 4.88  | 3.29   | 5.85  | 5.38  | 5.00   | 3.61   |
| RBD R     | 6.84  | 3.90  | 6.62   | 6.08  | 5.97  | 4.88  | 7.05  | 7.05   | 7.05  | 7.04  | 3.43   | 5.12   |
| 484A P    | 5.24  | 3.90  | 5.24   | 1.95  | 5.97  | 3.29  | 7.05  | 7.05   | 7.05  | 7.04  | 3.43   | 3.14   |
| 681 F     | 4.88  | 3.29  | 4.25   | 3.79  | 4.97  | 5.85  | 7.05  | 7.05   | 9.89  | 5.09  | 6.75   | 6.75   |
| 681 R     | 3.90  | 5.00  | 3.43   | 3.42  | 6.21  | 5.38  | 7.04  | 7.04   | 5.09  | 3.43  | 5.00   | 3.42   |
| 681H P    | 4.52  | 2.92  | 4.75   | 3.05  | 9.82  | 5.00  | 3.43  | 3.43   | 6.75  | 5.00  | 3.61   | 3.61   |
| 681R P    | 2.92  | 2.92  | 4.75   | 3.42  | 9.82  | 3.61  | 5.12  | 3.14   | 6.75  | 3.42  | 3.61   | 3.61   |

*Every oligo in the assay set was checked for dimerization with every other oligo in the set. Oligo sequences were entered in OligoAnalyzer Software (Integrated DNA Technologies, USA) and the highest binding energy constellation entered in the table (All values represent negative energy differential). Values above 8 (i.e. -8 kcal/mole) were further analyzed for overlap at the 3' ends, see supplementary Figure S1.*

# Supplementary Table S4

| Primer | NTD F | NTD R | Probe1 | RBD F | 484 F | 484 R | RBD R | Probe3 | 681 F | 681 R | Probe4 | Probe2 |
|--------|-------|-------|--------|-------|-------|-------|-------|--------|-------|-------|--------|--------|
| Zhen F | 0     | 0     | 0      | 0     | 0     | 0     | 0     | 0      | 0     | 0     | 0      | 0      |
| Zhen R | 0     | 0     | 0      | 0     | 0     | 0     | 0     | 0      | 0     | 0     | 0      | 0      |
| Zhen P | 0     | 0     | 0      | 0     | 0     | 0     | 0     | 0      | 0     | 0     | 0      | 0      |
| RBD F  | 0     | 0     | 0      | 0     | 0     | 0     | 0     | 0      | 0     | 0     | 0      | 0      |
| 484 F  | 0     | 0     | 0      | 0     | 0     | 0     | 0     | 0      | 0     | 0     | 0      | 0      |
| 484 R  | 0     | 0     | 0      | 0     | 0     | 0     | 0     | 0      | 0     | 0     | 0      | 0      |
| RBD R  | 0     | 0     | 0      | 0     | 0     | 0     | 969   | 0      | 0     | 0     | 0      | 0      |
| 484 P  | 0     | 0     | 0      | 0     | 0     | 0     | 0     | 57     | 0     | 0     | 0      | 0      |
| 681 F  | 0     | 0     | 0      | 0     | 0     | 0     | 0     | 0      | 0     | 672   | 0      | 0      |
| 681 R  | 0     | 0     | 0      | 0     | 0     | 0     | 0     | 0      | 0     | 0     | 0      | 0      |
| 681H P | 0     | 0     | 0      | 0     | 0     | 0     | 0     | 0      | 0     | 0     | 0      | 0      |
| 681R P | 0     | 0     | 0      | 0     | 0     | 0     | 0     | 0      | 0     | 0     | 0      | 0      |

Database: RefSeq RNA

- RBD R:    Homo sapiens GLI family zinc finger 2 (GLI2) (mRNA)
- 484P:     Homo sapiens translation initiation factor IF-2 (LOC105371191) (ncRNA)  
            Homo sapiens paraneoplastic antigen Ma6E-like (LOC105379547)
- 681R:     Homo sapiens nucleoporin 188 (NUP188) (mRNA)

*Every oligo combination was analyzed for potential amplification of human DNA or RNA sequences. Values in the table represent amplicate length in bp. Amplified targets are listed below. Probes are not considered relevant for production of unspecific amplicates. Products of 300 bp and below are a high risk of efficient amplification.*

# Supplementary Table S5

| <u>External Quality Control Panel</u>            |               |               |               |               |               |
|--------------------------------------------------|---------------|---------------|---------------|---------------|---------------|
| Species                                          | Number tested | Target: SDEL2 | Target: P681R | Target: E484A | Target: P681H |
| Influenza A H1N1 pdm09 (A/California/60/2008)    | 1             | Negative      | Negative      | Negative      | Negative      |
| Influenza B Victoria (B/Brisbane/60/2008)        | 1             | Negative      | Negative      | Negative      | Negative      |
| RSV-A                                            | 1             | Negative      | Negative      | Negative      | Negative      |
| RSV-B                                            | 1             | Negative      | Negative      | Negative      | Negative      |
| MERS-CoV                                         | 1             | Negative      | Negative      | Negative      | Negative      |
| hCoV-229E (ZeptoMetrix)                          | 1             | Negative      | Negative      | Negative      | Negative      |
| Parainfluenza-1 (ZeptoMetrix)                    | 1             | Negative      | Negative      | Negative      | Negative      |
| Parainfluenza-4 (ZeptoMetrix)                    | 1             | Negative      | Negative      | Negative      | Negative      |
| SARS-CoV (Frankfurt-1, cell culture supernatant) | 1             | Negative      | Negative      | Negative      | Negative      |
| <u>Clinical samples</u>                          |               |               |               |               |               |
| Species                                          |               | Target: SDEL2 | Target: P681R | Target: E484A | Target: P681H |
| hCoV - HKU1                                      | 1             | Negative      | Negative      | Negative      | Negative      |
| hCoV - NL63                                      | 1             | Negative      | Negative      | Negative      | Negative      |
| RSV                                              | 3             | Negative      | Negative      | Negative      | Negative      |
| Adenovirus                                       | 3             | Negative      | Negative      | Negative      | Negative      |
| Boca-virus                                       | 3             | Negative      | Negative      | Negative      | Negative      |
| Parainfluenzavirus 3                             | 3             | Negative      | Negative      | Negative      | Negative      |
| Human Metapneumovirus                            | 2             | Negative      | Negative      | Negative      | Negative      |
| Rhino-/Enterovirus                               | 2             | Negative      | Negative      | Negative      | Negative      |

*Viral species tested as part of the exclusivity/cross-reactivity panel. Clinical samples or external control material was utilized based on availability.*
